# Supplementary material for: 5-Fluorouracil treatment induces characteristic T>G mutations in human cancer
Source: PubMed Central journal article supplement (PMC6783534; doi:10.1038/s41467-019-12594-8), 2019-10-08
Supplement: 41467_2019_12594_MOESM2_ESM.pdf [file 41467_2019_12594_MOESM2_ESM.pdf]

**Editorial Note:** This manuscript has been previously reviewed at another journal that is not operating a transparent peer review scheme. This document only contains reviewer comments and rebuttal letters for versions considered at *Nature Communications*.

REVIEWERS' COMMENTS:

Reviewer #1 (Remarks to the Author):

The authors have fully addressed my comments.

The observation of higher mutation burden in TP53 mutant cancers is an interesting addition.

Reviewer #2 (Remarks to the Author):

The authors have addressed all my comments in a satisfactory manner. I recommend this manuscript for publication.

Reviewer #3 (Remarks to the Author):

The authors improved the paper during the revision, and I was convinced by the reviewer responses.

## Reviewers' comments addressed by the authors

### REVIEWERS' COMMENTS:

Reviewer #1 (Remarks to the Author):

The authors have fully addressed my comments.

The observation of higher mutation burden in TP53 mutant cancers is an interesting addition.

We agree that higher 5-FU related mutational accumulation in *TP53* null mutant tumors is interesting, and we thank you for pointing us in that direction.

Reviewer #2 (Remarks to the Author):

The authors have addressed all my comments in a satisfactory manner. I recommend this manuscript for publication.

We would like to thank the reviewer for all his or her constructive comments which improved the paper.

Reviewer #3 (Remarks to the Author):

The authors improved the paper during the revision, and I was convinced by the reviewer responses.

Thank you for your positive feedback and valuable comments that helped us to clarify certain passages in our manuscript.
